# Supplementary material for: Combinatorial Treatment with Apelin-13 Enhances the Therapeutic Efficacy of a Preconditioned Cell-Based Therapy for Peripheral Ischemia
Source: PubMed Central journal article supplement (PMC4725909; doi:10.1038/srep19379), 2016-01-14
Supplement: srep19379-s1.pdf [file srep19379-s1.pdf]

Supporting online materials for:

**Combinatorial Treatment with Apelin-13 Enhances the Therapeutic Efficacy of a  
Preconditioned Cell-Based Therapy for Peripheral Ischemia**

Makoto Samura, Noriyasu Morikage, Kotaro Suehiro, Yuya Tanaka, Tamami Nakamura,  
Arata Nishimoto, Koji Ueno, Tohru Hosoyama, Kimikazu Hamano

To whom correspondence should be addressed to:

Tohru Hosoyama (E-mail: [toruhoso@yamaguchi-u.ac.jp](mailto:toruhoso@yamaguchi-u.ac.jp))

This PDF file includes: Supplementary Figure S1.

a

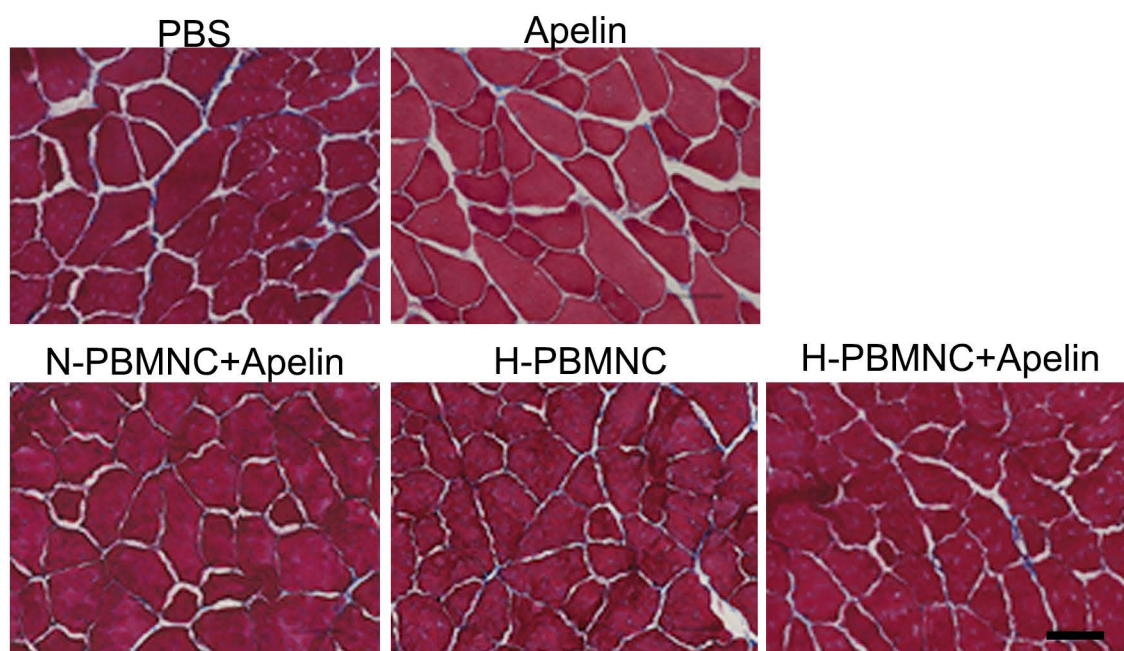

b

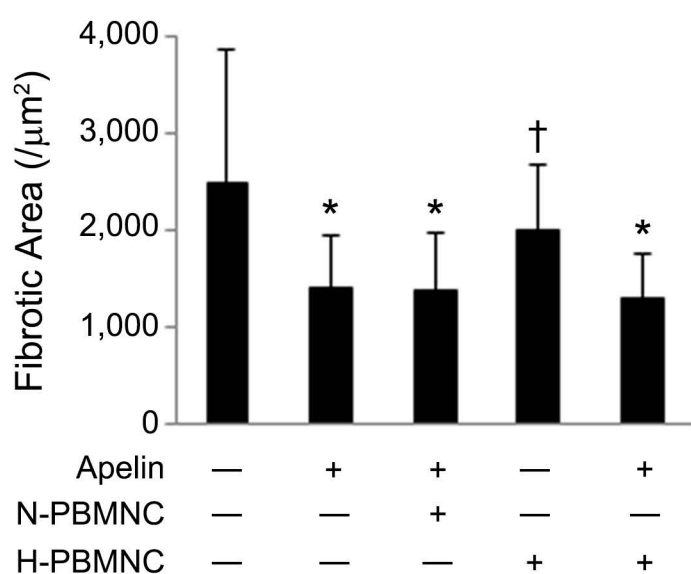

**Supplementary Figure S1.** Fibrosis analysis in ischemic hindlimbs on POD 28. (a) Masson's trichrome staining was performed on mouse muscle-cross sections of ischemic hindlimbs. Scale bar = 50 μm. Blue: fibrotic tissues. (b) Statistic analysis for fibrotic area in muscle-cross sections. \*:  $p < 0.01$  vs. PBS or H-PBMNC group; †:  $p < 0.01$  vs. PBS group.
